# Supplementary material for: Synthetic amyloid beta does not induce a robust transcriptional response in innate immune cell culture systems
Source: PubMed Central journal article supplement (PMC9034485; doi:10.1186/s12974-022-02459-1), 2022-04-23

# THP-1 macrophages + 24 hour LPS/IFN $\gamma$

RNA-Seq  
qPCR

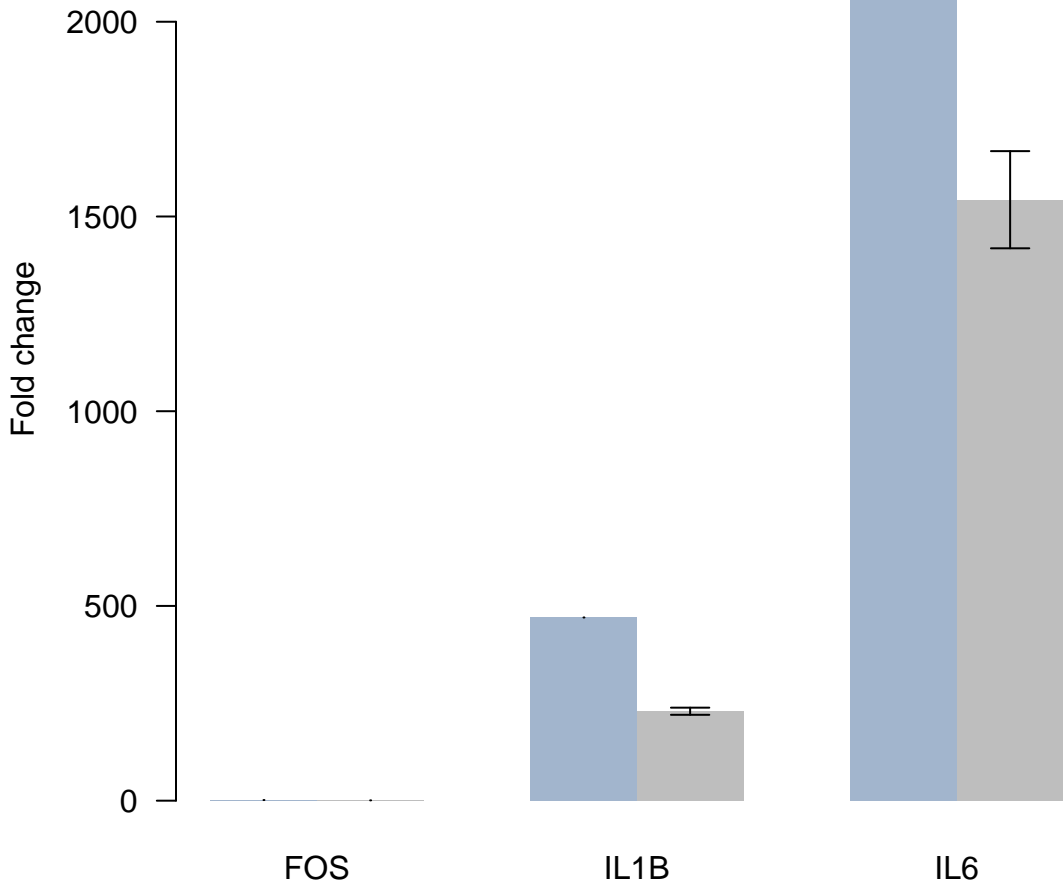

Supplement: 12974_2022_2459_MOESM2_ESM.pdf [file 12974_2022_2459_MOESM2_ESM.pdf]
